# Supplementary material for: Phenol transformation photosensitised by quinoid compounds
Source: Royal Society of Chemistry journal article supplement (doi:10.1039/c1cp20355j), 2011-01-01

## ELECTRONIC SUPPLEMENTARY INFORMATION

### PHENOL TRANSFORMATION PHOTSENSITISED BY QUINOID COMPOUNDS

**Valter Maurino,<sup>a</sup> Andrea Bedini,<sup>a</sup> Daniele Borghesi,<sup>a</sup> Davide Vione,<sup>a,b,\*</sup> Claudio Minero<sup>a,\*</sup>**

<sup>a</sup> *Dipartimento di Chimica Analitica, Università di Torino, Via P. Giuria 5, 10125 Torino, Italy.  
<http://www.chimicadellambiente.unito.it>*

<sup>b</sup> *Centro Interdipartimentale NatRisk, Università di Torino, Via Leonardo Da Vinci 44, 10095  
Grugliasco (TO), Italy.*

\* Corresponding authors. Fax +39-011-6707615 E-mail: [claudio.minero@unito.it](mailto:claudio.minero@unito.it)  
[davide.vione@unito.it](mailto:davide.vione@unito.it)

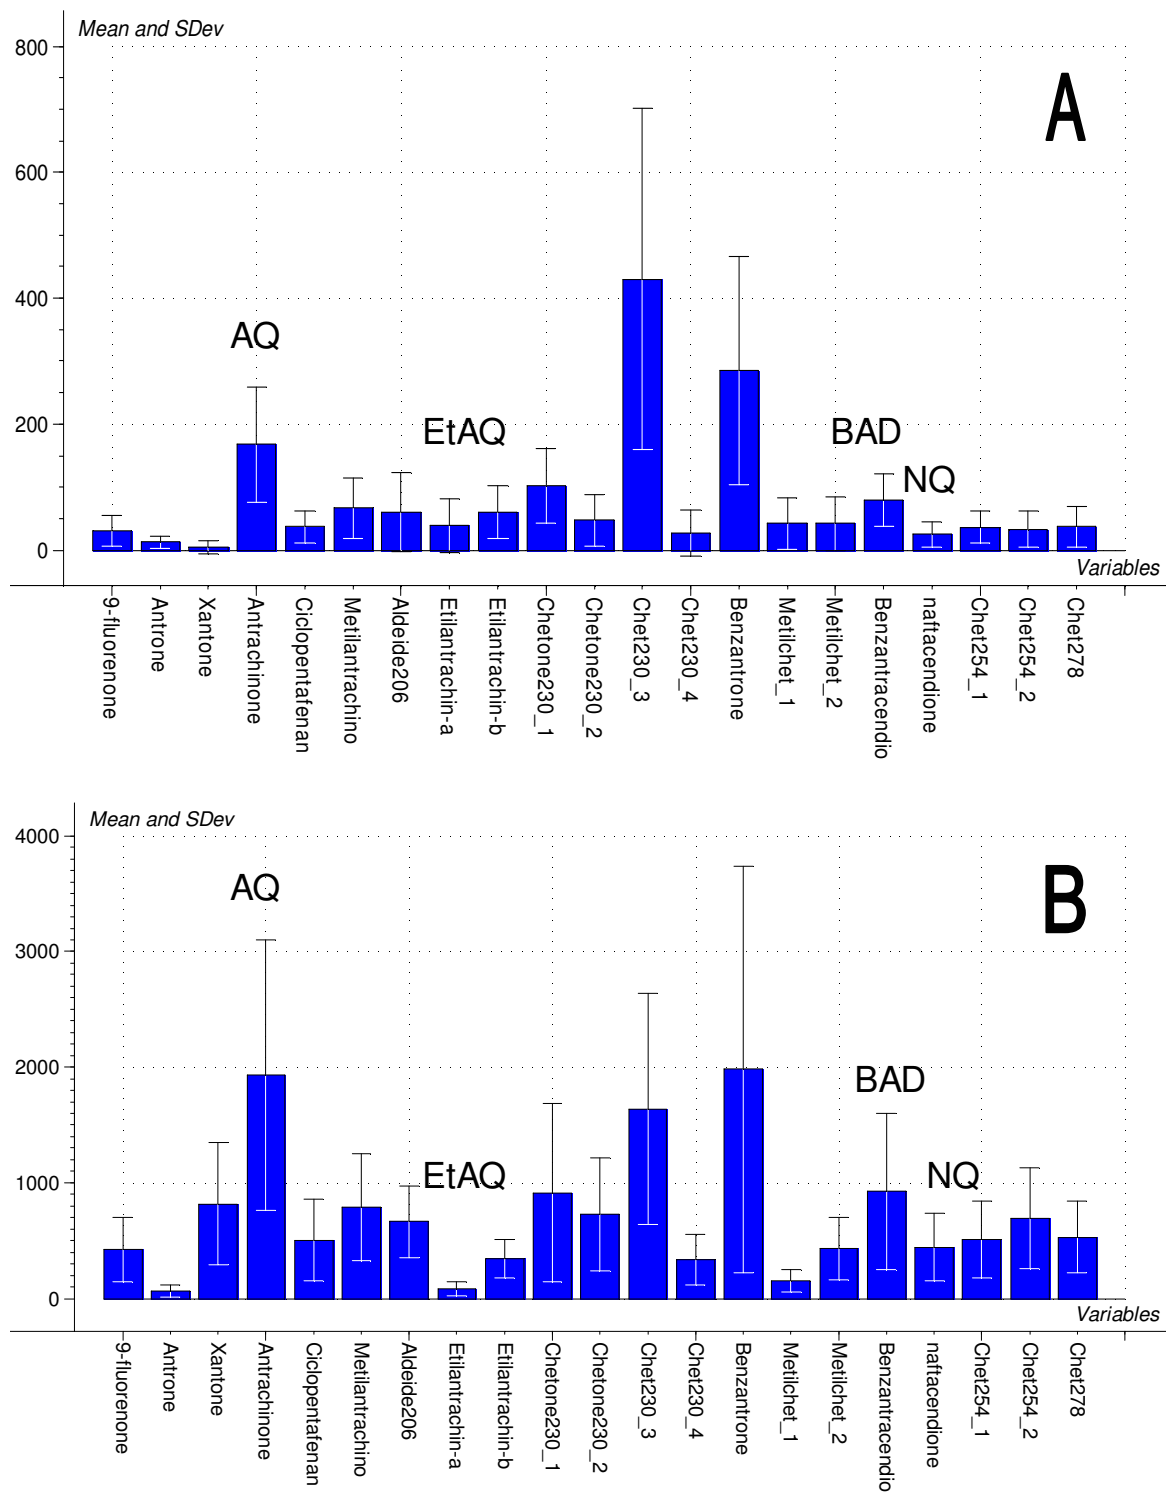

**Figure ES11.** Oxygenated polyaromatic compounds detected on atmospheric particulate matter in the province of Torino (NW Italy), in summer (A) and winter (B) sampling campaigns. The compounds investigated in the present study are highlighted. Note that two ethylantraquinone isomers have been detected on particulate matter. Units are arbitrary, derived from chromatographic peak areas.

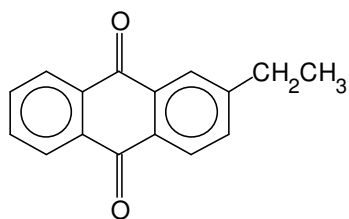

2-Ethylanthraquinone (**EtAQ**)

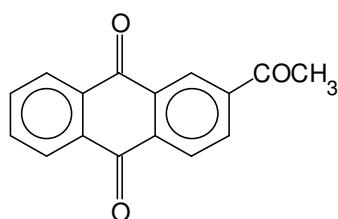

2-(1-Oxoethyl)anthraquinone

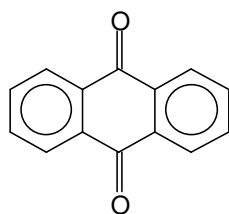

9,10-Anthraquinone (**AQ**)

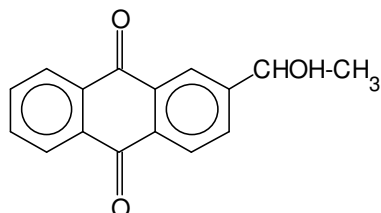

2-(1-Hydroxyethyl)anthraquinone

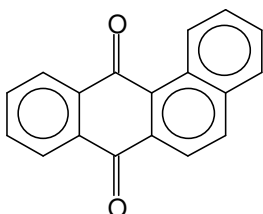

Benzanthracene-7,12-dione (**BAD**)

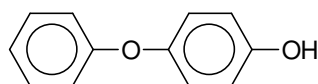

4-Phenoxyphenol

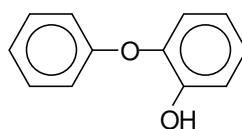

2-Phenoxyphenol

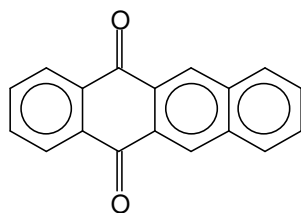

5,12-Naphthacenequinone (**NQ**)

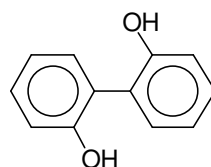

2,2'-Dihydroxybiphenyl

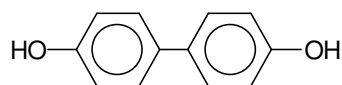

4,4'-Dihydroxybiphenyl

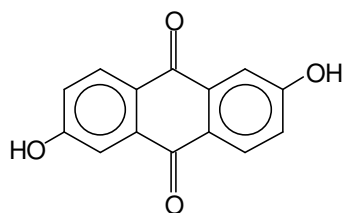

2,6-Dihydroxyanthraquinone (**DAQ**)

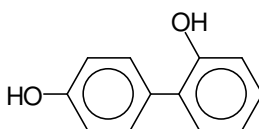

2,4'-Dihydroxybiphenyl

**Scheme ESI2.** Structure of the quinoid compounds under investigation (left) and of the detected transformation intermediates, formed upon irradiation of EtAQ and phenol (right).

### Optimised structures of AQ, DAQ and EtAQ

Figure ESI3, Figure ESI4 and Figure ESI5 show the gas-phase optimised structures of AQ, DAQ and EtAQ, respectively, in their ground state ( $S_0$ ). The list of atomic bonds is reported in Tables ESI6, ESI7 and ESI8, respectively. The obtained geometries were confirmed by analytical calculation of frequencies. The structures are here reported with their corresponding atoms labels, to facilitate the description of the results of our computational study.

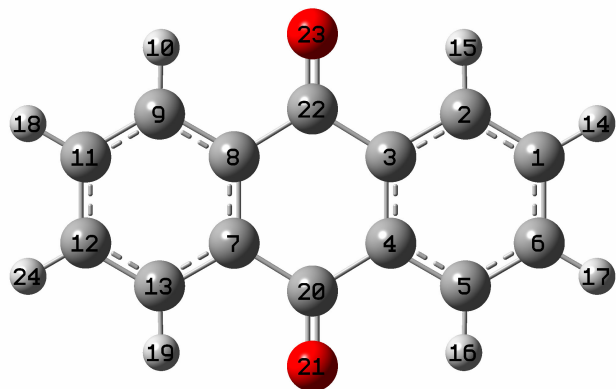

**Figure ESI3.** Optimised structure of AQ in its ground state ( $S_0$ ).

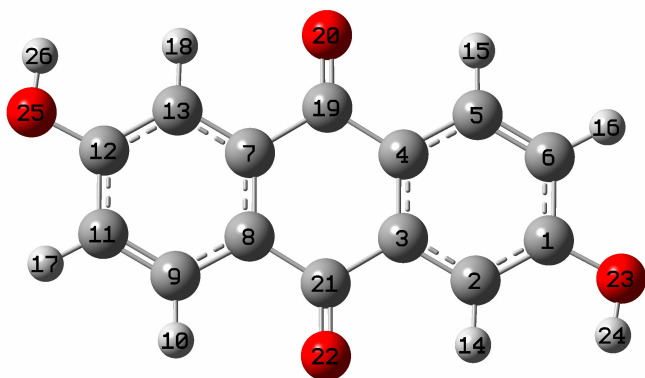

**Figure ESI4.** Optimised structure of DAQ in its ground state ( $S_0$ ).

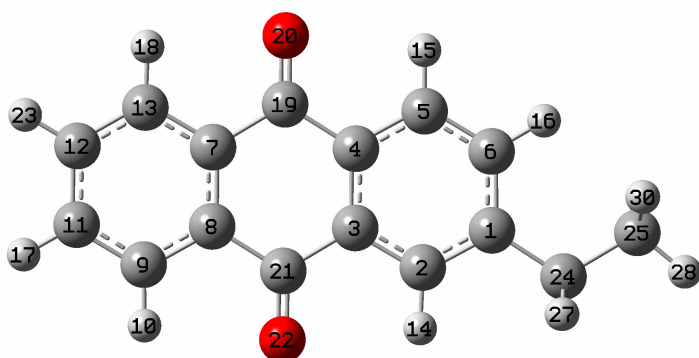

**Figure ESI5.** Optimised structure of EtAQ in its ground state ( $S_0$ ).

A geometry optimisation has been carried out for AQ, EtAQ and DAQ in their lower-lying triplet state ( $T_1$ ). A comparison of the bond lengths of the  $S_0$  and  $T_1$  states allows a better understanding of the nature of the  $T_1$  states.

For the AQ molecule, an increase of the C=O bond length is noticed when passing from  $S_0$  to  $T_1$ . In particular, the bond between the C22 – O23 atoms shows a noticeable lengthening of 0.08 Å, which confirms the incipient nature of the  $>C-O^\bullet$  bond at the excited state. The other carbonyl group (C20 – O21 atoms) displays just a weak lengthening (0.01 Å), similarly to the C–C lengths of the two lateral aromatic rings. As a consequence of the C=O lengthening there is a shortening of the C–C bond in the  $\alpha$  position with respect to the carbonyl group, which is more marked for the C3 – C22 – C8 system where the adjacent carbonyl stretching is more evident. The C–H bonds show negligible modifications. Information regarding AQ bond lengths is reported in Table ESI6.

The DAQ molecule has two -OH substituents and this leads to a change in its symmetry (from  $D_{2h}$  of AQ to  $C_{2h}$  of DAQ). The six-member carbon ring (C1 to C6) is poorly involved in spin resonance. Consequently, its aromaticity and bond lengths are almost the same as those in the  $S_0$  state, and the distance between the C1 – O23 atoms remains unperturbed. Also in this case, as for AQ, a lengthening of the C=O bonds is noticed. One carbonyl group (C21 – O22) shows a higher increase in interatomic distance than the other one (C19 – O20), *i.e.* 0.035 vs. 0.020 Å. To counterbalance the lengthening of the C=O bonds, a shrinking of the central six-member ring of the molecule is observed. The C-C bonds in  $\alpha$  with respect to the carbonyl group tend to gain a more marked  $sp^2$  character. This phenomenon is particularly intense for the C8 – C21 bond, showing a decrease of 0.052 Å. This could be interpreted in terms of both adjustment of the DAQ atoms in their new settlement for the  $S_0 \rightarrow T_1$  transition, and as consequence of the new resonance system occurring on the left side of the molecule, *i.e.* the conjugation between the -OH group and the dienic portion of the ring. For this reason the six-member carbon ring (C7 to C13) evolves from a phenolic-type into a quinoid-type structure, adjusting remarkably some bond lengths (C7 – C8, C8

– C9 and C11 – C12 show an increase of 0.065, 0.037 and 0.050 Å, respectively). The C12 – O25 bond is shortened due to spin resonance (0.016 Å), confirming the incipient nature of the >C–O• bond at the excited state (see Figure 9 in the manuscript for a pictorial scheme of these effects). Information regarding DAQ bond lengths is reported in Table ESI7.

The EtAQ molecule ( $C_S$  symmetry), when passing from  $S_0$  to  $T_1$ , shows the same bond length changes of AQ, namely the marked lengthening of the C21-O22 carbonyl group and the shortening of the C–C bonds in the  $\alpha$  position with respect to the cited carbonyl group (C3-C21-C8 system).

**Table ESI 6.** Bond lengths of the optimised AQ geometry in its S<sub>0</sub> and T<sub>1</sub> states.

| <b>Bond length (Å)</b> | <b>AQ (S<sub>0</sub>)</b> | <b>AQ (T<sub>1</sub>)</b> |
|------------------------|---------------------------|---------------------------|
| C22 – O23              | 1.2193                    | 1.3014                    |
| C20 – O21              | 1.2193                    | 1.2308                    |
| C1 – C2                | 1.3892                    | 1.3792                    |
| C2 – C3                | 1.3976                    | 1.4156                    |
| C3 – C4                | 1.4058                    | 1.4156                    |
| C4 – C5                | 1.3978                    | 1.4026                    |
| C5 – C6                | 1.3893                    | 1.3834                    |
| C6 – C1                | 1.3975                    | 1.4061                    |
| C7 – C8                | 1.4057                    | 1.4156                    |
| C8 – C9                | 1.3977                    | 1.4156                    |
| C9 – C11               | 1.3893                    | 1.3792                    |
| C11 – C12              | 1.3974                    | 1.4061                    |
| C12 – C13              | 1.3893                    | 1.3834                    |
| C13 – C7               | 1.3979                    | 1.4026                    |
| C7 – C20               | 1.4926                    | 1.4770                    |
| C20 – C4               | 1.4926                    | 1.4771                    |
| C3 – C22               | 1.4927                    | 1.4410                    |
| C22 – C8               | 1.4926                    | 1.4410                    |
| C1 – H14               | 1.0841                    | 1.0841                    |
| C2 – H15               | 1.0829                    | 1.0836                    |
| C5 – H16               | 1.0829                    | 1.0834                    |
| C6 – H17               | 1.0841                    | 1.0837                    |
| C9 – H10               | 1.0830                    | 1.0836                    |
| C11 – H18              | 1.0841                    | 1.0841                    |
| C12 – H24              | 1.0838                    | 1.0836                    |
| C13 – H19              | 1.0830                    | 1.0834                    |

**Mulliken atomic spin densities of AQ in its T<sub>1</sub> state:**

|      |           |
|------|-----------|
| 1 C  | -0.060777 |
| 2 C  | 0.128816  |
| 3 C  | -0.010696 |
| 4 C  | 0.138971  |
| 5 C  | -0.050138 |
| 6 C  | 0.124872  |
| 7 C  | 0.138955  |
| 8 C  | -0.010683 |
| 9 C  | 0.128824  |
| 10 H | -0.006734 |
| 11 C | -0.060772 |
| 12 C | 0.124853  |
| 13 C | -0.050131 |
| 14 H | 0.003207  |
| 15 H | -0.006734 |
| 16 H | 0.002598  |
| 17 H | -0.007178 |
| 18 H | 0.003206  |
| 19 H | 0.002598  |
| 20 C | -0.013835 |
| 21 O | 0.203419  |
| 22 C | 0.322594  |
| 23 O | 0.961942  |
| 24 H | -0.007177 |

*Sum of Mulliken spin densities= 2.00000*

**Table ESI 7.** Bond lengths of the optimised DAQ geometry in its S<sub>0</sub> and T<sub>1</sub> states.

| <b>Bond length (Å)</b> | <b>DAQ (S<sub>0</sub>)</b> | <b>DAQ (T<sub>1</sub>)</b> |
|------------------------|----------------------------|----------------------------|
| C21 – O22              | 1.2212                     | 1.2567                     |
| C19 – O20              | 1.2212                     | 1.2412                     |
| C12 – O25              | 1.3578                     | 1.3414                     |
| C1 – O23               | 1.3578                     | 1.3565                     |
| C1 – C2                | 1.3940                     | 1.3870                     |
| C2 – C3                | 1.3927                     | 1.4008                     |
| C3 – C4                | 1.4052                     | 1.4199                     |
| C4 – C5                | 1.4014                     | 1.4141                     |
| C5 – C6                | 1.3830                     | 1.3729                     |
| C6 – C1                | 1.4027                     | 1.4148                     |
| C7 – C8                | 1.4051                     | 1.4702                     |
| C8 – C9                | 1.4014                     | 1.4384                     |
| C9 – C11               | 1.3829                     | 1.3539                     |
| C11 – C12              | 1.4027                     | 1.4528                     |
| C12 – C13              | 1.3940                     | 1.3919                     |
| C13 – C7               | 1.3927                     | 1.3877                     |
| C7 – C19               | 1.4972                     | 1.4605                     |
| C19 – C4               | 1.4816                     | 1.4686                     |
| C3 – C21               | 1.4972                     | 1.4681                     |
| C21 – C8               | 1.4916                     | 1.4397                     |
| C2 – H14               | 1.0851                     | 1.0851                     |
| C5 – H15               | 1.0829                     | 1.0829                     |
| C6 – H16               | 1.0831                     | 1.0831                     |
| C9 – H10               | 1.0829                     | 1.0822                     |
| C11 – H17              | 1.0831                     | 1.0827                     |
| C13 – H18              | 1.0851                     | 1.0862                     |
| O25 – H26              | 0.9635                     | 0.9669                     |
| O23 – H24              | 0.9635                     | 0.9642                     |

**Mulliken atomic spin densities of DAQ in its T<sub>1</sub> state:**

|      |           |
|------|-----------|
| 1 C  | 0.054797  |
| 2 C  | 0.019617  |
| 3 C  | 0.031226  |
| 4 C  | 0.074356  |
| 5 C  | 0.001478  |
| 6 C  | 0.025466  |
| 7 C  | 0.239933  |
| 8 C  | 0.477089  |
| 9 C  | -0.051240 |
| 10 H | -0.000880 |
| 11 C | 0.162017  |
| 12 C | 0.303870  |
| 13 C | -0.029262 |
| 14 H | -0.002232 |
| 15 H | -0.001106 |
| 16 H | -0.001740 |
| 17 H | -0.010192 |
| 18 H | -0.000545 |
| 19 C | 0.010684  |
| 20 O | 0.198101  |
| 21 C | 0.003797  |
| 22 O | 0.339950  |
| 23 O | 0.031433  |
| 24 H | -0.001075 |
| 25 O | 0.128799  |
| 26 H | -0.004338 |

*Sum of Mulliken spin densities = 2.00000*



**Table ESI 8.** Bond lengths of the optimised EtAQ geometry in its  $S_0$  and  $T_1$  states.

| Bond length (Å) | EtAQ ( $S_0$ ) | EtAQ ( $T_1$ ) |
|-----------------|----------------|----------------|
| C19 – O20       | 1.2199         | 1.2307         |
| C21 – O22       | 1.2195         | 1.3018         |
| C1 – C2         | 1.3982         | 1.3878         |
| C2 – C3         | 1.3931         | 1.4113         |
| C3 – C4         | 1.4070         | 1.4150         |
| C4 – C5         | 1.3946         | 1.3992         |
| C5 – C6         | 1.3905         | 1.3848         |
| C6 – C1         | 1.4010         | 1.4095         |
| C7 – C8         | 1.4058         | 1.4159         |
| C8 – C9         | 1.3978         | 1.4160         |
| C9 – C11        | 1.3892         | 1.3791         |
| C11 – C12       | 1.3974         | 1.4062         |
| C12 – C13       | 1.3892         | 1.3835         |
| C13 – C7        | 1.3976         | 1.4024         |
| C7 – C19        | 1.4936         | 1.4778         |
| C19 – C4        | 1.4886         | 1.4758         |
| C3 – C21        | 1.4926         | 1.4429         |
| C21 – C8        | 1.4931         | 1.4405         |
| C1 – C24        | 1.5178         | 1.5204         |
| C24 – C25       | 1.5293         | 1.5297         |
| C2 – H14        | 1.0845         | 1.0852         |
| C5 – H15        | 1.0831         | 1.0837         |
| C6 – H16        | 1.0829         | 1.0824         |
| C9 – H10        | 1.0829         | 1.0837         |
| C11 – H17       | 1.0841         | 1.0842         |
| C12 – H23       | 1.0841         | 1.0837         |
| C13 – H18       | 1.0829         | 1.0835         |
| C24 – H27       | 1.0964         | 1.0962         |
| C24 – H26       | 1.0964         | 1.0963         |
| C25 – H28       | 1.0923         | 1.0925         |
| C25 – H29       | 1.0935         | 1.0934         |
| C25 – H30       | 1.0935         | 1.0934         |

**Mulliken atomic spin densities of EtAQ in its  $T_1$  state:**

|      |           |
|------|-----------|
| 1 C  | -0.060249 |
| 2 C  | 0.141648  |
| 3 C  | -0.009334 |
| 4 C  | 0.126028  |
| 5 C  | -0.047859 |
| 6 C  | 0.116174  |
| 7 C  | 0.144022  |
| 8 C  | -0.014204 |
| 9 C  | 0.1328    |
| 10 H | -0.006957 |
| 11 C | -0.062876 |
| 12 C | 0.130034  |
| 13 C | -0.053144 |
| 14 H | -0.007486 |
| 15 H | 0.002573  |
| 16 H | -0.006655 |
| 17 H | 0.0033    |
| 18 H | 0.002717  |
| 19 C | -0.013188 |
| 20 O | 0.19661   |
| 21 C | 0.330766  |
| 22 O | 0.961032  |
| 23 H | -0.007484 |
| 24 C | 0.004879  |

25 C -0.000136  
26 H -0.001614  
27 H -0.001613  
28 H 0.000069  
29 H 0.000073  
30 H 0.000073

Sum of Mulliken spin densities = 2.00000

**Table ESI 9.** Adiabatic ( $T_O$ ) and vertical ( $T_V$ ) transition energies of AQ, DAQ and EtAQ for the  $S_0$ - $T_1$  transition.

|       | <i>AQ</i> | <i>EtAQ</i> | <i>DAQ</i> |
|-------|-----------|-------------|------------|
| $T_O$ | 2.57      | 2.59        | 2.52       |
| $T_V$ | 2.75      | 2.78        | 2.79       |

Energies are expressed in eV. Adiabatic energy is measured computing the difference among the two optimised geometries in the  $S_0$  and  $T_1$  states. Instead, vertical energy is calculated among the optimized geometry in the  $S_0$  state and that at the  $T_1$  state, constrained to  $S_0$  (as reported in the following pictorial scheme).

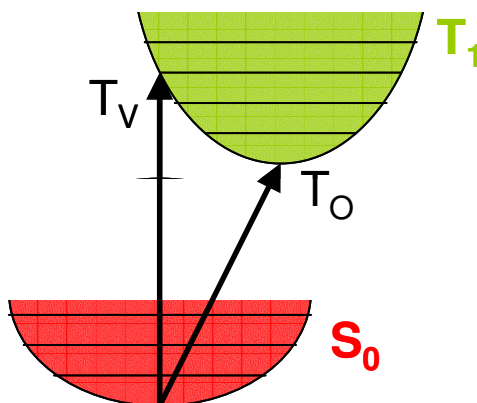

Supplement: c1cp20355j.pdf [file c1cp20355j.pdf]
